# Supplementary material
Source: PubMed Central journal article supplement (PMC6348153)

# Supplementary Figure 1

## A

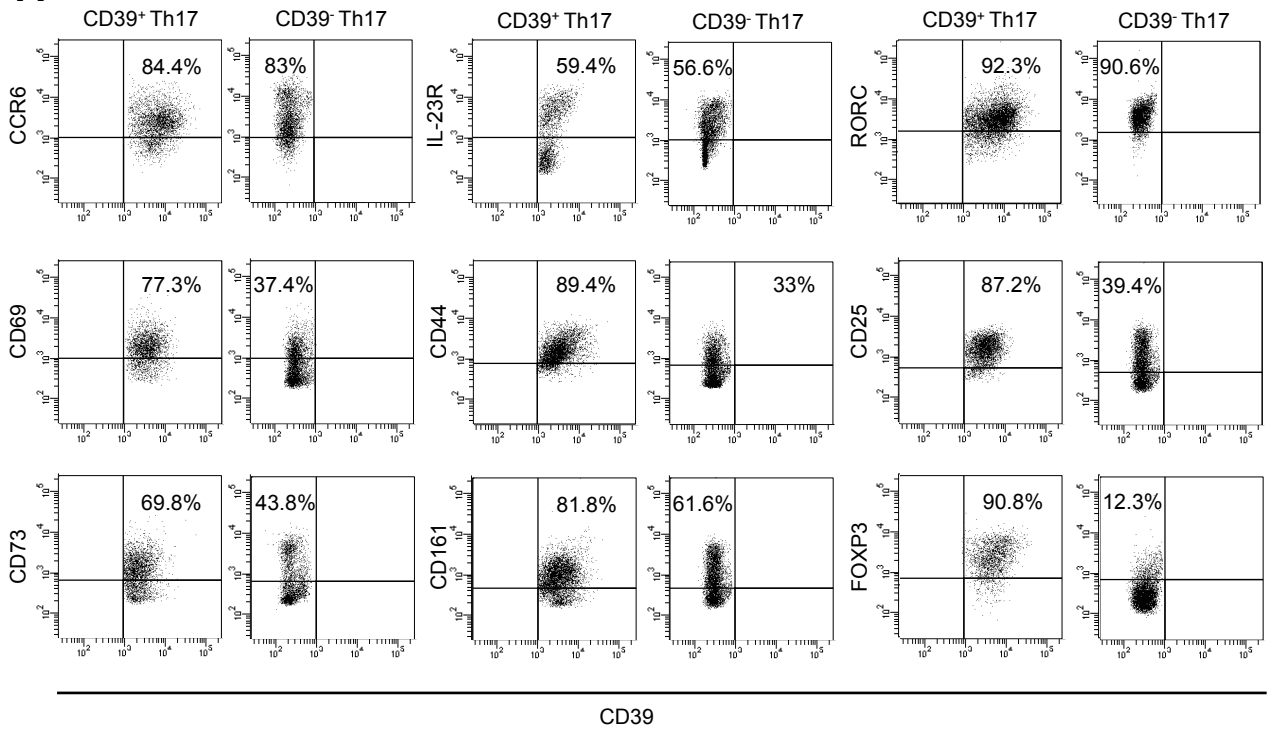

## B

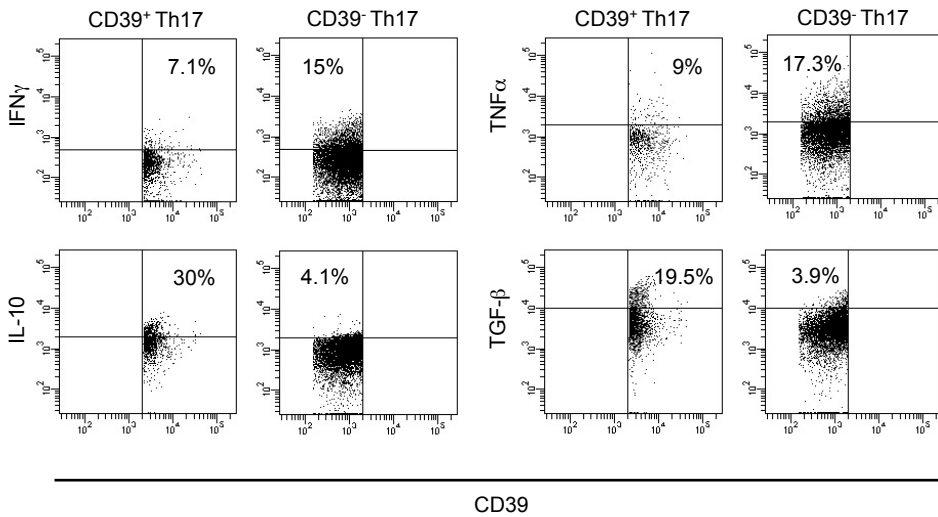

# Supplementary Figure 2

**A**

**CD4**

**ENTPD1**

20X

20X

**Pt. 1**

20X

20X

**Pt. 2**

**B**

**Alexa488  
CD4**

**Alexa594  
ENTPD1**

**Hoechst  
Nuclei**

**Merge**

40X

40X

40X

40X

**Pt. 1**

40X

40X

40X

40X

**Pt. 2**

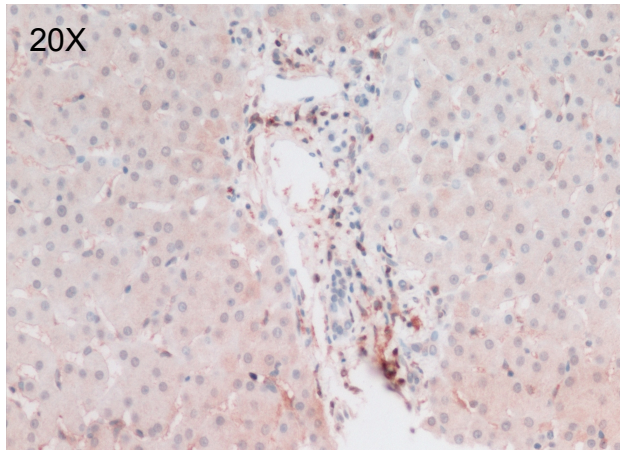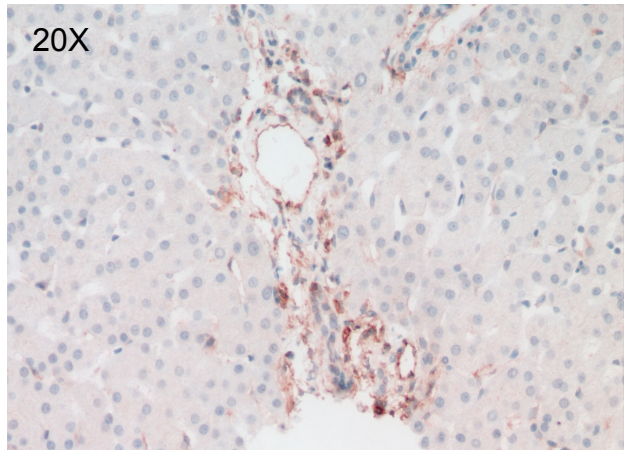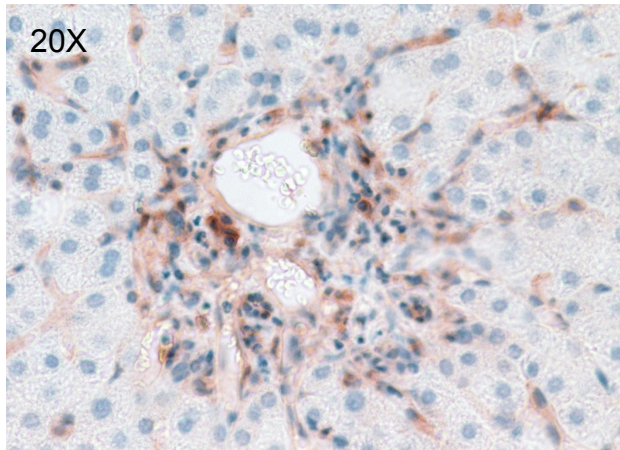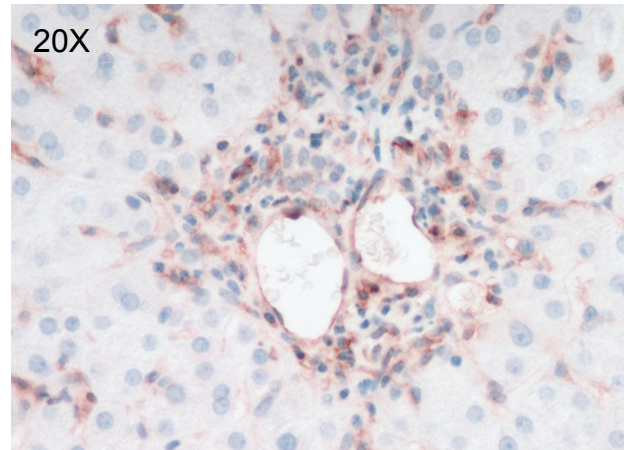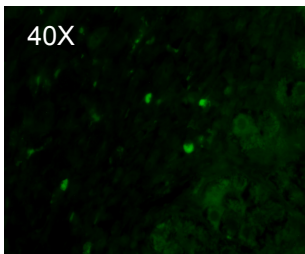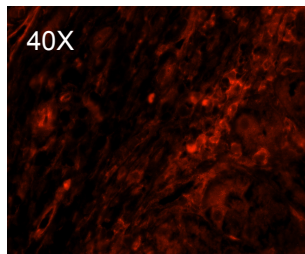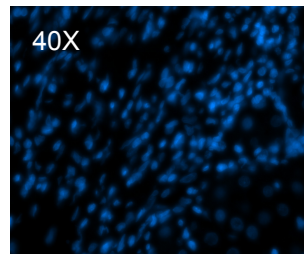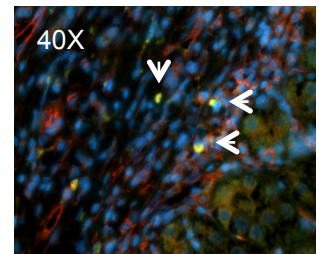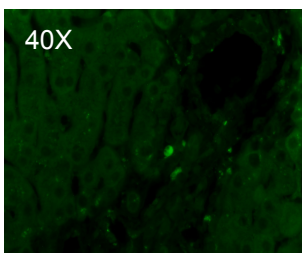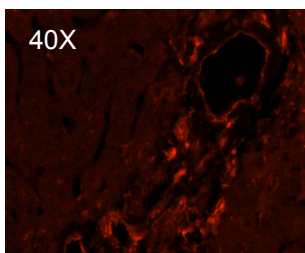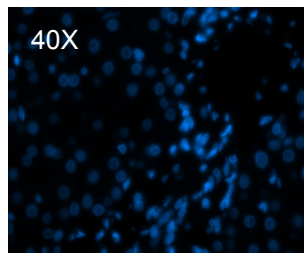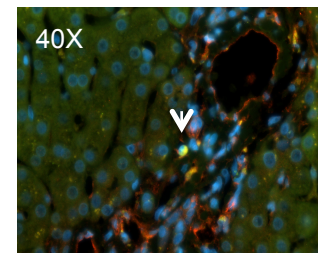

Supplement: NIHMS1006158-supplement-1.pdf [file NIHMS1006158-supplement-1.pdf]
